# Supplementary material for: Environmental Enrichment Factors Associated with the Activity Level of Bottlenose Dolphins under Professional Care
Source: MDPI journal article supplement (doi:10.3390/jzbg3010004), 2022-01-21
Supplement: s1 [file s1]

## Cetacean Welfare Animal Enrichment Survey

Indicate the number of days in a typical 30 day month that the dolphins receive each type of enrichment.

| Enrichment                     | Sinking or Floating | Number of days | Average duration the object/s are given |
|--------------------------------|---------------------|----------------|-----------------------------------------|
| Above water and scuba play     |                     |                |                                         |
| Balls and buoys                |                     |                |                                         |
| Boomer and beach balls         |                     |                |                                         |
| Bubble machines                |                     |                |                                         |
| Changing conspecifics          |                     |                |                                         |
| Dead fish                      |                     |                |                                         |
| Feeder balls and spools        |                     |                |                                         |
| Foam rollers, bats, and sticks |                     |                |                                         |
| Hula hoops                     |                     |                |                                         |
| Ice and gelatin                |                     |                |                                         |
| Kayaking and Zorb balls        |                     |                |                                         |
| Legos and dive bricks          |                     |                |                                         |
| Live fish                      |                     |                |                                         |
| Mats, sleds, and ice bergs     |                     |                |                                         |
| Mirror, television, and movies |                     |                |                                         |
| Noodles                        |                     |                |                                         |
| Puzzle feeders                 |                     |                |                                         |
| Rub ropes and seaweed boas     |                     |                |                                         |
| Tubs                           |                     |                |                                         |
| Underwater music or sounds     |                     |                |                                         |
| Underwater window play         |                     |                |                                         |
| Water spray and brush boards   |                     |                |                                         |
