# Supplementary material for: Environmental Enrichment Factors Associated with the Activity Level of Bottlenose Dolphins under Professional Care
Source: MDPI journal article supplement (doi:10.3390/jzbg3010004), 2022-01-21
Supplement: s1 [file s1]

Archive with 1 entries (1 files):
- Supplementary S1.pdf
